# Supplementary material for: Triazacyclohexane complexes of chromium as highly active homogeneous model systems for the Phillips catalyst
Source: Royal Society of Chemistry journal article supplement (doi:10.1039/b005842o), 2000-01-01
Supplement: b005842o.doc [file b005842o.doc]

Electronic Supplementary Information (ESI) to

Triazacyclohexane complexes of chromium as highly active homogeneous model systems for the Phillips catalyst

Randolf D. Köhn,* Matthias Haufe, Shahram Mihan*, Dieter Lilge

### Experimental

The n-alkyl substituted 1,3,5-triazacyclohexanes were prepared according to literature and distilled (**1a**-**c**) or re-crystallised from ethanol(**1d**).[1] All complexes can be prepared analogous to **2a**[2] from [CrCl3(THF)3] (method I), **2c,d** also directly from CrCl3 (method II). **2c,d** can be purified by chromatography with CHCl3 on silica gel. Solvents for method I and the polymerisation were dried over Na/benzophenone and vacuum transferred prior to use.

Preparation of **2d**:

Method I: Diethyl ether (40 ml) was condensed to [CrCl3(THF)3] (2.02 g, 5.4 mmol) and **1d** (3.20 g, 5.4 mmol) and stirred for 30 min. The purple solid was separated by filtration and washed with ether until no green colour is left in the solution. Drying in vacuo (10 Pa) yielded 3.65 g of **2d** (90 %).
Method II: **1d** (40.4 g, 68 mmol) was dissolved in toluene (500 ml). A few ml of toluene were distilled off and after cooling in a stream of argon anhydrous CrCl3 (11.4 g, 72 mmol) was added. A few more ml of toluene were distilled off and after cooling in a stream of argon zinc powder (1 g) was added. With the beginning of the distillation the suspension turned into a deeply purple solution. Slow distillation was continued for 30 min and the remaining solvent was removed by rotary evaporation at 10 hPa. The remaining solid was washed with ether until no green colour was left in the solution. Chromatography with chloroform on silica gel (200 ml) yields 36.3 g (71 %) of purple **2d**.

Complexes **2b** (method I) and **2c** (method I or II) were prepared analogously.

IR (KBr, /cm-1):

**2b**: 423m, 535s, 728m, 736m, 924m, 949m, 986m, 1007m, 1092s, 1111s, 1129m, 1169m, 1240m, 1289m, 1326m, 1362m, 1382m, 1441m, 1462m, 2858s, 2872m, 2932s, 2959s

**2c**: 534w, 721m, 909m, 1093m, 1109m, 1292w, 1328w, 1379w, 1468m, 2853m, 2926m, 2955m

**2d**: 919w, 948m,1020w, 1094m, 1114m, 1131m, 1157w, 1172w, 1216w, 1245w, 1261w, 1295w, 1320w, 1327w, 1336w, 1360w, 1378w, 1396w, 1457m, 1469m, 2851s, 2872s, 2921s, 2954s

UV/Vis (THF) in nm ( in cm-1mol-1l):

**2b** (reflectance in KBr):668, 499

**2c**: 720 (4500), 512 (8900), 302 (6200)

**2d**: 718 (680), 505 (1280), 338 (3390)

MS (70 eV): *m/z* (%): 42/44 (100)

**2b**: 454 (0.5) [M+], 419 (0.4) [(M-Cl)+], 418 (0.6) [(M-HCl)+], 383 (1.8) [(M—Cl-HCl)+], 382 (3.7) [(M-2HCl)+], 296 (7.6) [(**1b**-H)+], 198 (16) [(**1b**-(PentylN=CH2)+]

**2c**: 580 (0.1) [M+], 545 (0.1) [(M-Cl)+], 544 (0.2) [(M-HCl)+], 509 (0.2) [(M—Cl-HCl)+], 508 (3.2) [(M-2HCl)+], 422 (1.6) [(**1c**-H)+], 282 (2.5) [(**1b**-(OctylN=CH2)+]

**2d**: 677 (0.1) [(M-2HCl)+], 590 (0.04) [(**1d**-H)+]

Magnetic moments (Evans method in CH2Cl2):

**2c** 3.9 B**, 2d** 3.8 B

Melting points(dec.): **2b** 296 °C, **2c** 193 °C, **2d** 183 °C

Elemental analyses: found (calculated)

**2b** (C18H39Cl3CrN3): C 46.7 (47.4), H 8.4 (8.6), N 9.1 (9.2)

**2c** (C27H57Cl3CrN3): C 55.9 (55.7), H 9.7 (9.8), N 7.4 (7.2) **2d** (C39H81Cl3CrN3): C 62.4 (62.4), H 11.0 (10.9), N 5.5 (5.6)

**Polymerisation experiments:**

Polymerisation at normal pressure:

**2** (5-20 mol) in toluene (250 ml) was placed into a 1l flask with thermometer, teflon stirrer, and gas inlet tube and heated to 40°C. For activation with MAO, a 1.6 M solution in toluene was added. For activation with borate, DMAB (dimethylanilinium tetrakis(pentafluorophenyl)borate) was added, heated to 70°C and then Tibal (triisobutylaluminium) added and the resulting solution cooled to 40°C. Then 20 to 40 l/h of ethene was bubbled through the solution for one hour. In the co-polymerisation experiment, 5 ml of hexene was added before and 25 ml (addition funnel, 15 min) during the addition of ethene. The reaction was quenched by addition of a mixture of conc. HCl (15 ml) and methanol (50 ml). After 15 min of stirring the product was precipitated by addition of more methanol (250 ml). Filtration after 15 min, washing with methanol (3x) and drying at 70°C yielded the polymer. Reaction and polymer data are given in table 1.

In separate runs the polymerisation was quenched with water and the filtered and separated toluene solution analysed by GC or NMR after concentration by distillation (1-hexene in first fraction, decenes after removal of most of the toluene).

| **complex** | **amount** | **Al:Cr** | **Cr:B** | **C6** | **activity** | **densitya** | **[]b** | **Mwc** | **Mw/Mn** | **C6** | **CH3** |
| --- | --- | --- | --- | --- | --- | --- | --- | --- | --- | --- | --- |
|  | mg (µmol) | - | - | ml | Kg/molCr*h | g/cm³ | dl/g | g/mol | - | [%] | /1000C |
| **2d** | 12.5 (17) | 320:1 | - | - | 717 | 0.957 | 1.04 | 28000 | 2.0 | - | 2.6 |
| **2d** | 23 (31) | 19:1 | 1:1.5 | - | 324 | 0.962 | 0.65 | 23000 | 3.2 | - | 3.0 |
| **2d** | 15 (20) | 80:1 | 1:1.5 | 30 | 390 | 0.946 | 3.83 | - | - | 1.7 | 8.7 |
| **2a** | 4.8 (17) | 470:1 | - | - | 455 | 0.960 | 1.68 | 37000 | 3.1 | - | 1.7 |
| **2a** | 5.2 (18) | 50:1 | 1:1.7 | - | 590 | 0.963 | 2.66 | - | - | - | 1.3 |

**Table 1: Reaction and polymer data at normal pressure**

| **MAO:Cr** | **activity** | **** | **trans** | **vinyl** | **vinylidene** | **total Me** | **density** |
| --- | --- | --- | --- | --- | --- | --- | --- |
|  | kg/molCr*h | [dl/g] | /1000C | /1000C | /1000C | /1000C | g/cm³ |
| 100 | 20 | 3.38 | 0.04 | 0.58 | 0.07 | 2.1 | 0.9612 |
| 200 | 645 | 0.64 | 0.05 | 0.9 | 0.16 | 1.9 | 0.9572 |
| 350 | 595 | 0.55 | 0.1 | 1.03 | 0.21 | 4.2 | 0.9613 |
| 1000 | 435 | 0.3 | 0.06 | 0.75 | 0.68 | 11.2 | 0.9621 |
| 5000 | 267 | 0.11 | <0.01 | 0.46 | 0.6 | 13.2 | 0.9684 |

Table 2. Dependence of the activity and polymer properties on the Al:Cr ratio under constant conditions

(1 bar, 40°C, different MAO charge from table 1)

| **T °C** | MAO:Cr | **activity** | **** | **trans** | **vinyl** | **vinylidene** | **total Me** | **density** |
| --- | --- | --- | --- | --- | --- | --- | --- | --- |
|  |  | kg/molCr*h | [dl/g] | /1000C | /1000C | /1000C | /1000C | g/cm³ |
| 40 | 350 | 717 | 1.04 | 0.07 | 0.9 | 0.13 | 2.6 | 0.9570 |
| 50 | 350 | 288 | 0.7 | 0.26 | 1.58 | 0.34 | 6.2 | 0.9657 |
| 60 | 350 | 91 | 0.46 | 0.4 | 3.24 | 0.88 | 12.3 | 0.960 |

Table 3: Dependence of the polymer properties on the polymerisation temperature**;** the intrinsic viscosity  which corelates to the molecular weight; 1 bar ethene, Al:Cr=350

Polymerisation at 40 bar:

MAO (as solution in toluene) and isobutane (400 ml) were placed into a 1-l-autoclave. After pressurizing to 40 bar with ethene and heating to 70°C, the catalyst is added. The polymerisation was stopped after 60 min. Reaction and polymer data are given in table 4.

| **complex** | **amount** | **MAO** | **Al:Cr** | **activity** | **yield** | **densitya** | **[]b** | **Mwc** | **Mw/Mn** | **mp.** | **CH3** |
| --- | --- | --- | --- | --- | --- | --- | --- | --- | --- | --- | --- |
|  | mg(µmol) | mmol |  | kg/molCr/h | [g] | g/cm³ | dl/g | g/mol | - | [°C] | /1000C |
| **2b** | 49 (107) | 35 | 325 | 4130 | 74d | 0.974 | 0.34 | 5300 | 3.9 | 117 | 14.00 |
| **2c** | 5.8 (10) | 5 | 500 | 14844 | 153 | 0.959 | 0.73 | 40000 | 3.7 | 131 | 2.40 |
| **2b** | 6.0 (13) | 5 | 384 | 13083 | 172 | 0.966 | 1.21 | 40000 | 4.5 | 130 | 2.10 |

Table 4: Reaction and polymer data at 40 bar

a : ISO 1183

b : ISO 1628 in decaline at 135°C

c : following DIN 55672, in 1,2,4-TCB as solvent at 135°C,

calibration with linear polyethene

d : stopped after 10 minutes because of heating to 100°C

Commercial Phillips HDPE:

| **condition** | **trans** | **vinyl** | **vinylidene** | **total Me** |
| --- | --- | --- | --- | --- |
|  | /1000C | /1000C | /1000C | /1000C |
| homopolymerisation | 0.01 | 0.75 | 0.06 | 1.6 |
| co-polymerisation | 0.03 | 0.72 | 0.08 | 2.4 |
| In-situ co-polymerisation | 0.10 | 2.43 | 0.35 | 4.7 |

Table 5: Comparison to commercially available Phillips HPDE products (BASF) (FTIR analyses (100 m film) of products produced at 40 bar, 100°C in isobutane)

[1] C. W. Hoerr, E. Rapkin, A. E. Brake, K. N. Warner, H. J. Harwood, *J. Am. Chem. Soc.* **78** (1956) 4667-4670.

[2] R. D. Köhn, G. Kociok-Köhn, *Angew. Chem*. **106** (1994) 1958-1960; *Angew. Chem., Int. Ed. Engl.* **33** (1994) 1877-1879.
